# Supplementary material for: Injury Occurrence and Return to Dance in Professional Ballet: Prospective Analysis of Specific Correlates
Source: MDPI journal article supplement (doi:10.3390/ijerph16050765), 2019-03-03
Supplement: s1 [file s1]

**Table S1.** Descriptive data for the observed variables (F=frequencies, %-percentage).

|                                         | All ( <i>n</i> = 99) |       | Males ( <i>n</i> = 41) |       | Females ( <i>n</i> = 58) |       |
|-----------------------------------------|----------------------|-------|------------------------|-------|--------------------------|-------|
|                                         | F                    | %     | F                      | %     | F                        | %     |
| <b>Age</b>                              |                      |       |                        |       |                          |       |
| <19 years                               | 9                    | 9.09  | 5                      | 12.20 | 4                        | 6.90  |
| 19–22 years                             | 14                   | 14.14 | 6                      | 14.63 | 8                        | 13.79 |
| 23–26 years                             | 12                   | 12.12 | 6                      | 14.63 | 6                        | 10.34 |
| 27–30 years                             | 10                   | 10.10 | 3                      | 7.32  | 7                        | 12.07 |
| 31–34 years                             | 10                   | 10.10 | 3                      | 7.32  | 7                        | 12.07 |
| 35–38 years                             | 15                   | 15.15 | 9                      | 21.95 | 6                        | 10.34 |
| >38 years                               | 29                   | 29.29 | 9                      | 21.95 | 20                       | 34.48 |
| <b>Educational level</b>                |                      |       |                        |       |                          |       |
| Elementary school                       | 4                    | 4.04  | 2                      | 4.88  | 2                        | 3.45  |
| High school                             | 59                   | 59.60 | 25                     | 60.98 | 0                        | 0.00  |
| College/University student              | 1                    | 1.01  | 1                      | 2.44  | 34                       | 58.62 |
| College/University level                | 35                   | 35.35 | 13                     | 31.71 | 22                       | 37.93 |
| <b>Experience in ballet</b>             |                      |       |                        |       |                          |       |
| 10–15 years                             | 22                   | 22.22 | 13                     | 31.71 | 9                        | 15.52 |
| 16–20 years                             | 21                   | 21.21 | 6                      | 14.63 | 15                       | 25.86 |
| 21–25 years                             | 26                   | 26.26 | 13                     | 31.71 | 13                       | 22.41 |
| >25 years                               | 30                   | 30.30 | 9                      | 21.95 | 21                       | 36.21 |
| <b>Ballet performance level</b>         |                      |       |                        |       |                          |       |
| Corps de ballet                         | 19                   | 19.19 | 5                      | 12.20 | 14                       | 24.14 |
| First artist                            | 77                   | 77.78 | 34                     | 82.93 | 43                       | 74.14 |
| Soloist                                 | 3                    | 2.00  | 1                      | 2.50  | 1                        | 1.72  |
| Principal                               | 1                    | 1.00  | 1                      | 2.50  | 0                        | 0.00  |
| <b>Number of training hours</b>         |                      |       |                        |       |                          |       |
| <20 hours                               | 10                   | 10.10 | 4                      | 9.76  | 6                        | 10.34 |
| 21–25 hours                             | 21                   | 21.21 | 5                      | 12.20 | 12                       | 20.69 |
| 26–30 hours                             | 23                   | 23.23 | 10                     | 24.39 | 13                       | 22.41 |
| >30 hours                               | 45                   | 45.45 | 22                     | 53.66 | 27                       | 46.55 |
| <b>Cigarette smoking</b>                |                      |       |                        |       |                          |       |
| Never smoked                            | 44                   | 44.44 | 15                     | 36.59 | 29                       | 50.00 |
| Quit                                    | 1                    | 1.01  | 0                      | 0.00  | 1                        | 1.72  |
| From time to time, but not daily        | 10                   | 10.10 | 0                      | 0.00  | 10                       | 17.24 |
| Less than 10 cigs daily                 | 10                   | 10.10 | 2                      | 4.88  | 8                        | 13.79 |
| 10–20 cigs daily                        | 26                   | 26.26 | 18                     | 43.90 | 8                        | 13.79 |
| From one to two packs daily             | 8                    | 8.08  | 6                      | 14.63 | 2                        | 3.45  |
| More than 2 packs daily                 | 0                    | 0.00  | 0                      | 0.00  | 0                        | 0.00  |
| <b>Binge drinking</b>                   |                      |       |                        |       |                          |       |
| I don't drink alcohol                   | 9                    | 9.09  | 8                      | 19.51 | 1                        | 1.72  |
| I drink alcohol but never binge         | 26                   | 26.26 | 8                      | 19.51 | 18                       | 31.03 |
| Rarely                                  | 12                   | 12.12 | 5                      | 12.20 | 7                        | 12.07 |
| Binge drinking couple of times per year | 6                    | 6.06  | 2                      | 4.88  | 4                        | 6.90  |
| Binge drinking once a month or so       | 29                   | 29.29 | 9                      | 21.95 | 20                       | 34.48 |
| Binging one a week                      | 8                    | 8.08  | 3                      | 7.32  | 5                        | 8.62  |
| Binging couple of times per week        | 9                    | 9.09  | 6                      | 14.63 | 3                        | 5.17  |
| <b>Consumption of illicit drugs</b>     |                      |       |                        |       |                          |       |
| Yes                                     | 26                   | 26.26 | 10                     | 24.39 | 16                       | 27.58 |
| No                                      | 73                   | 73.73 | 31                     | 75.61 | 42                       | 72.41 |
| <b>Number of injuries</b>               |                      |       |                        |       |                          |       |
| 0                                       | 23                   | 23.23 | 9                      | 21.95 | 14                       | 24.14 |
| 1                                       | 29                   | 29.29 | 12                     | 29.27 | 17                       | 29.31 |
| 2                                       | 22                   | 22.22 | 6                      | 14.63 | 16                       | 27.59 |
| 3                                       | 6                    | 6.06  | 2                      | 4.88  | 4                        | 6.90  |
| 4                                       | 9                    | 9.09  | 5                      | 12.20 | 4                        | 6.90  |
| 4                                       | 3                    | 3.03  | 2                      | 4.88  | 1                        | 1.72  |
| 5                                       | 4                    | 4.04  | 2                      | 4.88  | 2                        | 3.45  |
| 6                                       | 0                    | 0.00  | 0                      | 0.00  | 0                        | 0.00  |
| 7                                       | 0                    | 0.00  | 0                      | 0.00  | 0                        | 0.00  |
| 8                                       | 0                    | 0.00  | 0                      | 0.00  | 0                        | 0.00  |
| 9                                       | 3                    | 3.03  | 3                      | 7.32  | 0                        | 0.00  |
| <b>Time-off from injury</b>             |                      |       |                        |       |                          |       |

|                  |    |       |    |       |    |       |
|------------------|----|-------|----|-------|----|-------|
| No absence       | 37 | 37.37 | 13 | 31.71 | 24 | 41.38 |
| Less than 3 days | 14 | 14.14 | 8  | 19.51 | 6  | 10.34 |
| 4-7 days         | 3  | 3.03  | 2  | 4.88  | 1  | 1.72  |
| More than 7 days | 45 | 45.45 | 18 | 43.90 | 27 | 46.55 |
